# Supplementary figures and images for: Integrated Metabolome and Transcriptome Analysis Provide Insights into the Effects of Grafting on Fruit Flavor of Cucumber with Different Rootstocks
Source: MDPI journal article supplement (doi:10.3390/ijms20143592), 2019-07-23

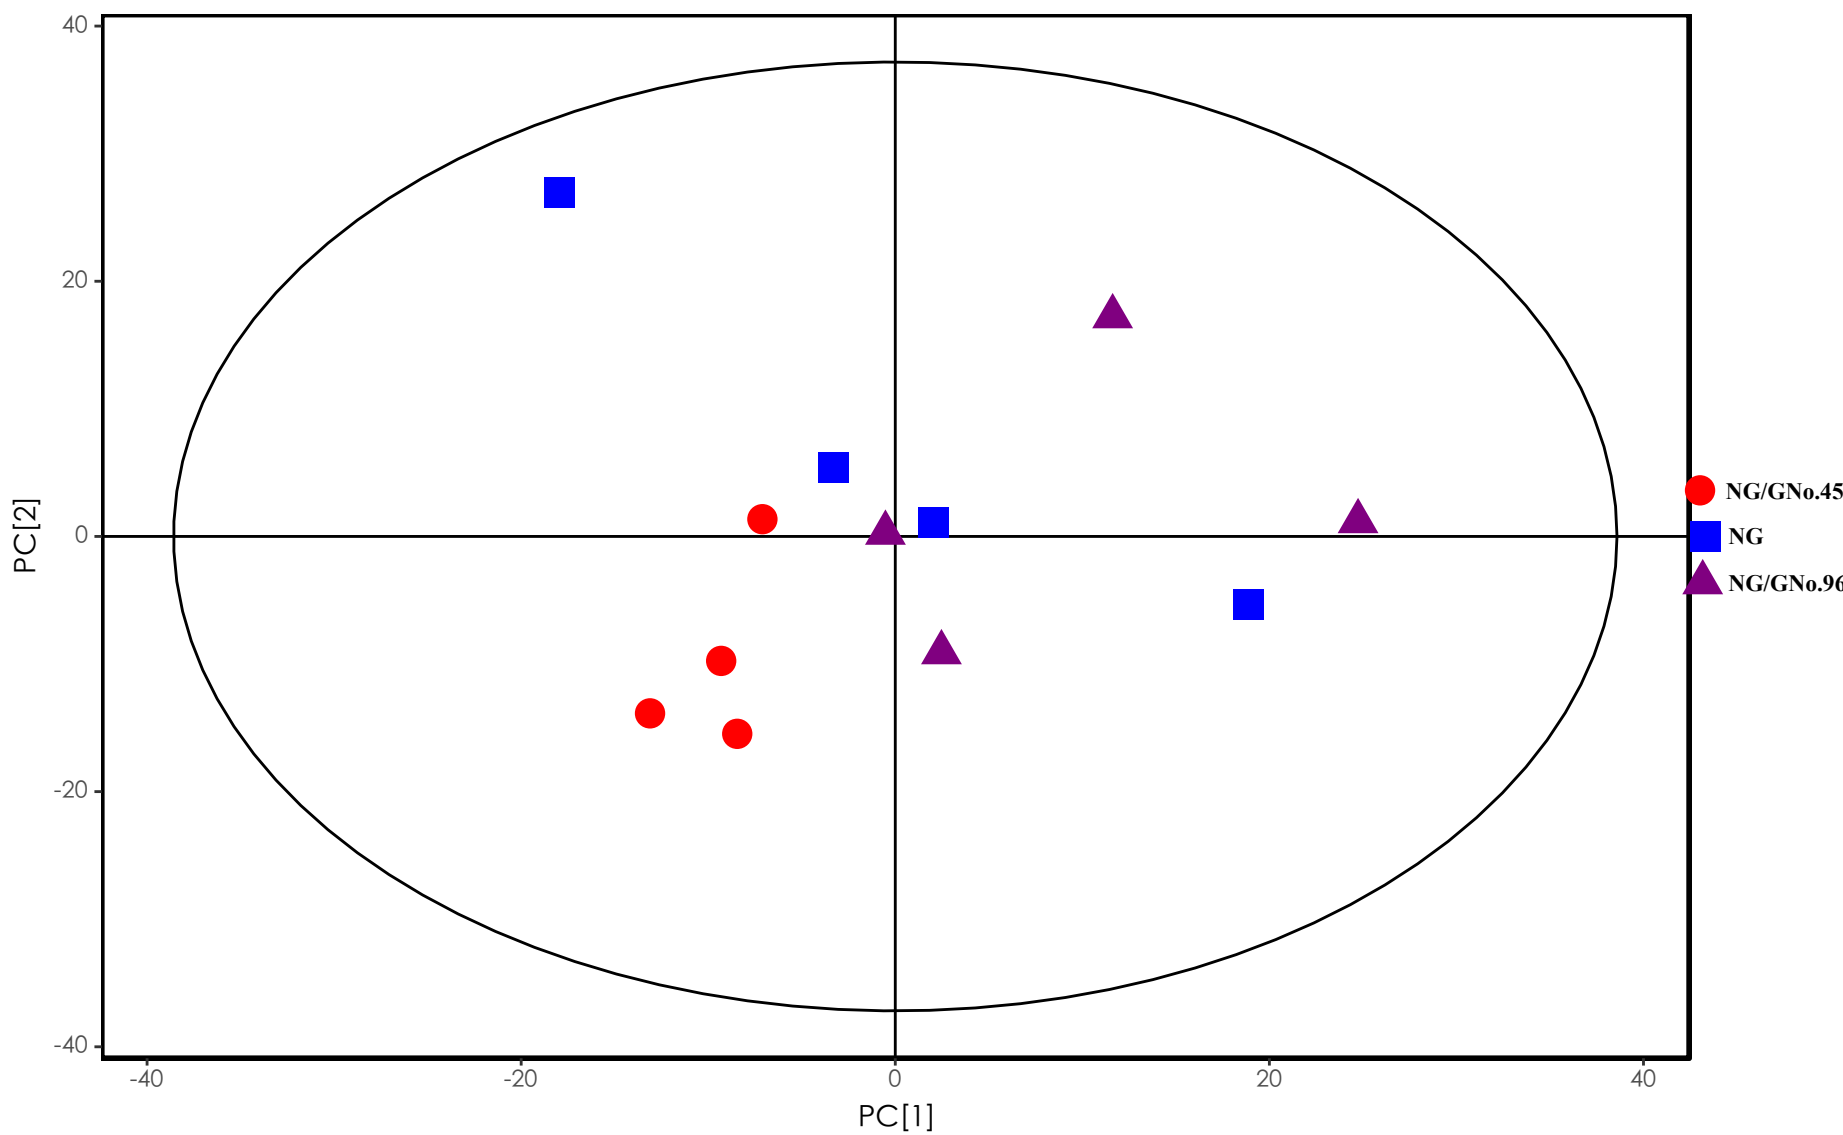



Supplement: s1 [file s1]

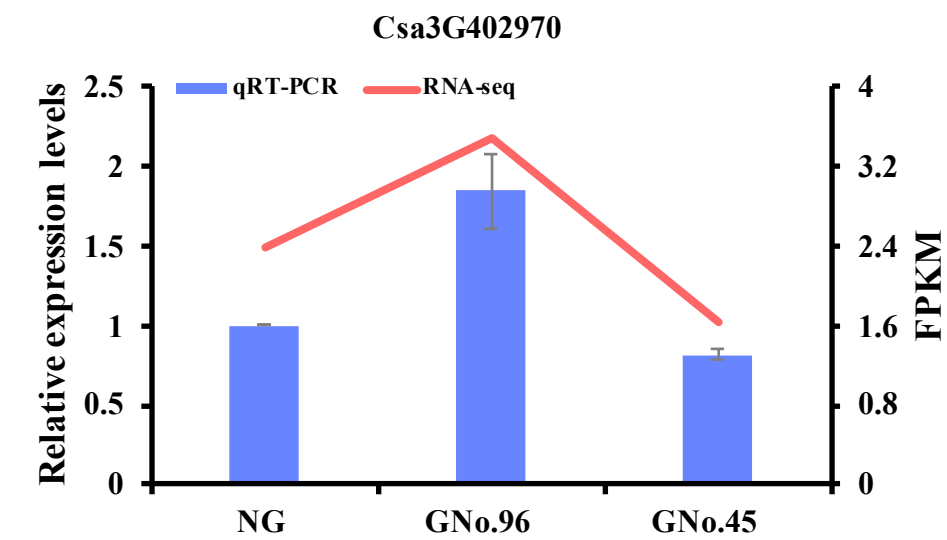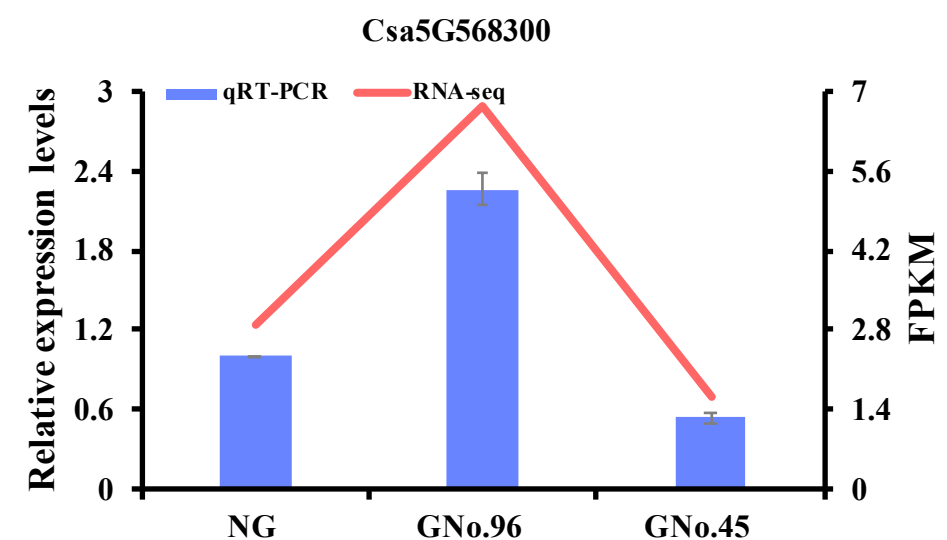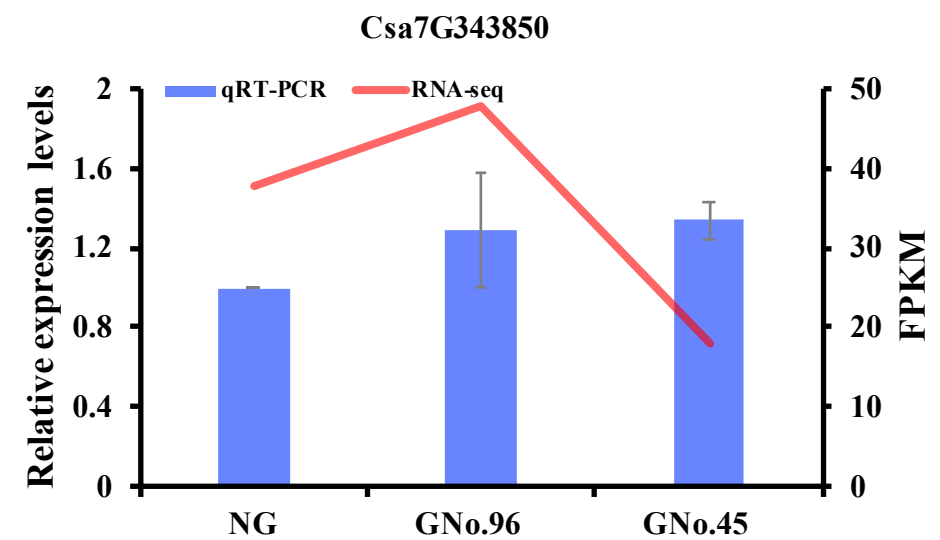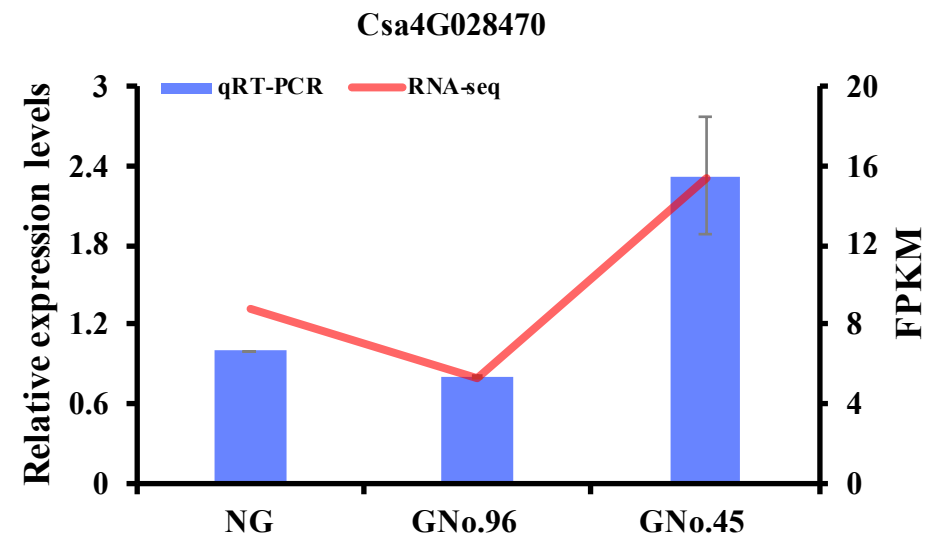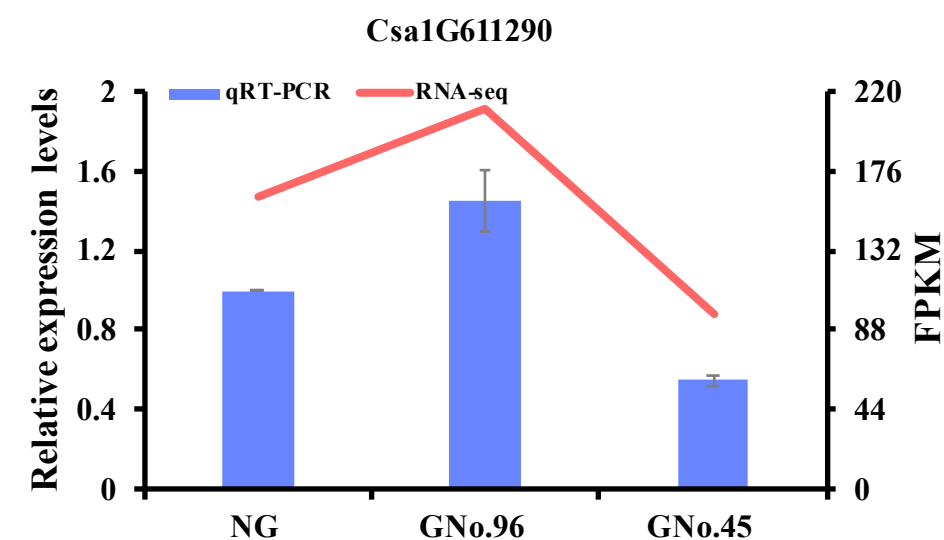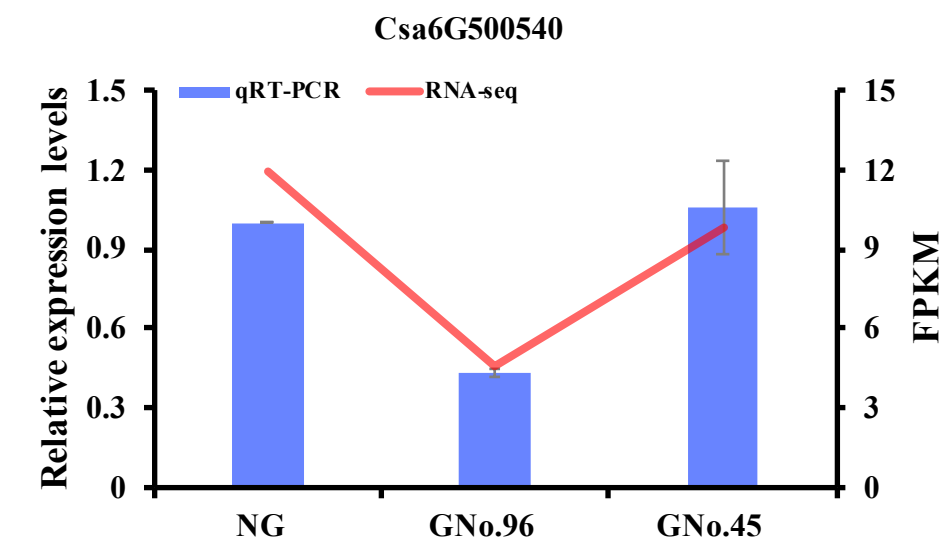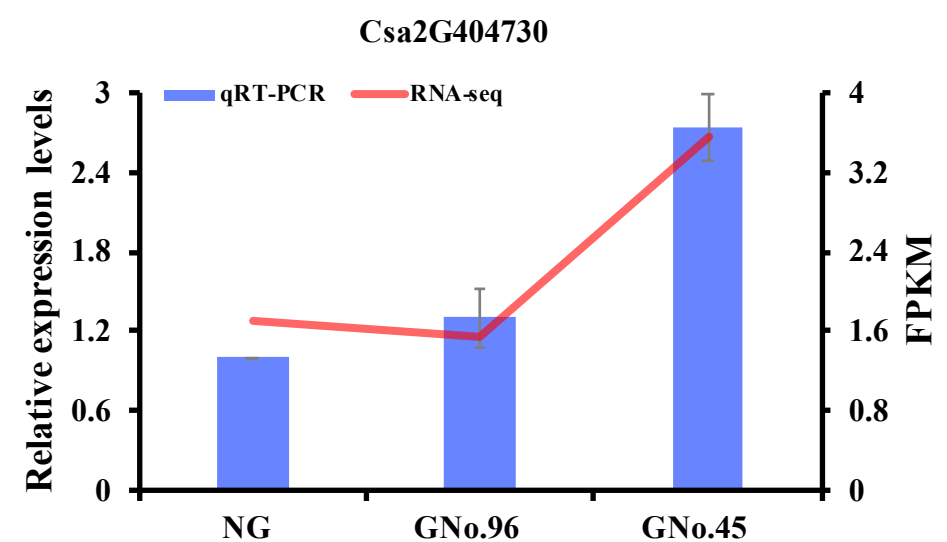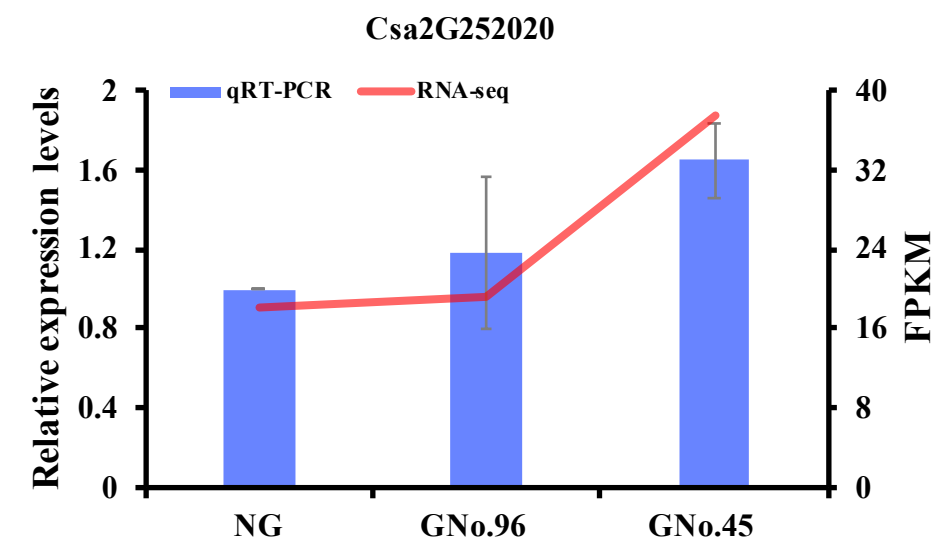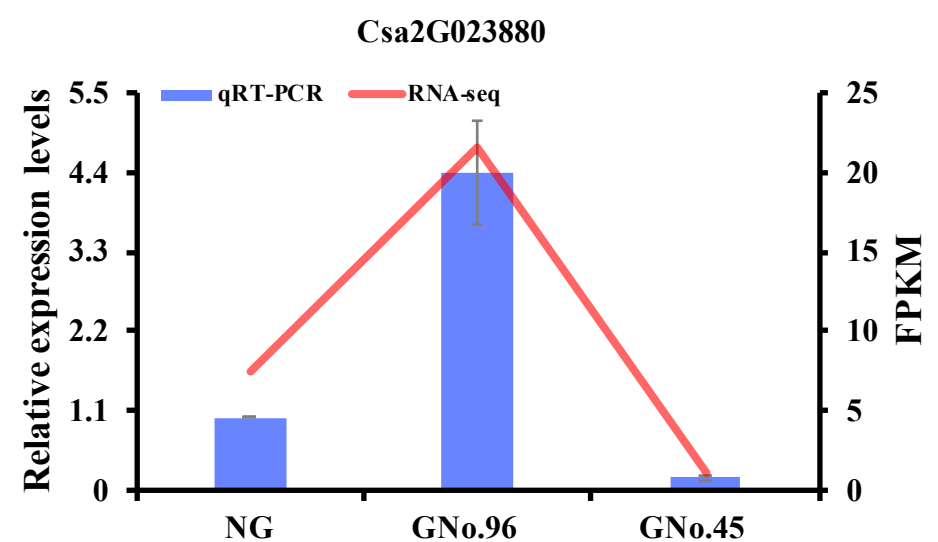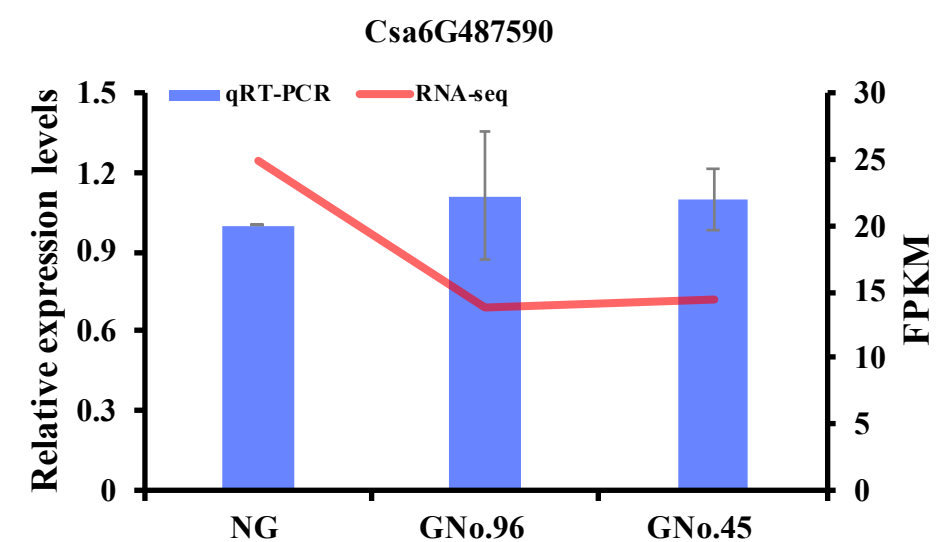

Supplement: s1 [file s1]
